# Supplementary material for: Efficacy and optimal dosage of various exercises for migraine: a multilevel network and dose-response meta-analysis
Source: PeerJ. 2025 Oct 20;13:e20254. doi: 10.7717/peerj.20254 (PMC12548639; doi:10.7717/peerj.20254)
Supplement: Supplemental Information 1 [file peerj-13-20254-s001.xlsx]

## Sheet: Sheet1
cov_id	studyID	arm_number	country	funded	trt	supervise	class	intensity_met	session_duration	sessions	weeks	daily_dose	weekly_dose	pc_female	mean_age	sd.age	outcome	weeks_from_end_of_treatment_to_measurement	pre_n	pre_mean	pre_sd	n	mean	sd
1	Varkey2011	1	Sweden	Y	Aerobic	Y	Exercise	4	30	3	12	120	360	0.93	47	10.8	VAS	0	30	3.1	3.2	25	0	3
1	Varkey2011	2	Sweden	Y	Control		Control	0	0	0	0	0	0	0.83	41.5	11.4	VAS	0	30	4.7	3.2	26	0	3.2
1	Varkey2011	4	Sweden	Y	Aerobic	Y	Exercise	4	30	3	12	120	360	0.93	47	10.8	VAS	12	30	3.1	3.5	22	0	3
1	Varkey2011	5	Sweden	Y	Control		Control	0	0	0	0	0	0	0.83	41.5	11.4	VAS	12	30	4.7	3.5	23	0	3.5
1	Varkey2011	7	Sweden	Y	Aerobic	Y	Exercise	4	40	2	12	160	360	0.93	47	10.8	VAS	24	30	3.1	3.6	16	0	3
1	Varkey2011	8	Sweden	Y	Control		Control	0	0	0	0	0	0	0.83	41.5	11.4	VAS	24	30	4.7	3.6	14	0	3.6
2	Narin2003	9	Turkey	N	Aerobic	Y	Exercise	3	50	3	8	150	450	1	40.1	4	VAS	0	20	8.8	1.7	20	4	1.4
2	Narin2003	10	Turkey	N	Control		Control	0	0	0	0	0	0	1	40	5.5	VAS	0	20	8.5	0.8	20	7	0.9
2	Narin2003	11	Turkey	N	Aerobic	Y	Exercise	4	50	5	8	200	1000	1	35	5	QLS	0	20	84.2	8.1	20	22.6	7
2	Narin2003	12	Turkey	N	Control		Control	0	0	0	0	0	0	1	50.1	5	QLS	0	20	84.5	6.9	20	75.5	6
3	Oliveira2019	13	Brazil	N	Aerobic	Y	Exercise	3	40	6	12	120	720	0.84	36.2	10.9	Migraine intensity scale	0	15	1.7	0.45	15	1	0.34
3	Oliveira2019	14	Brazil	N	Control		Control	0	0	0	0	0	0	0.76	36.2	10.9	Migraine intensity scale	0	15	1.9	0.45	15	2.1	0.54
4	Kisan2014	15	India	Y	Yoga	Y	Exercise	2.3	30	5	6	69	138	0.7	31.72	10.77	VAS	0	47	8.7	2.8	30	4.03	1.3
4	Kisan2014	16	India	Y	Control		Control	0	0	0	0	0	0	0.63	31.27	8.63	VAS	0	37	9.3	1.2	30	7.73	1.2
5	Kumar2020	21	India	Y	Yoga	Y	Exercise	2.3	30	5	8	69	345	0.72	30.5	8.01	NRS	0	80	8.3	3.33	80	5.7	2.38
5	Kumar2020	22	India	Y	Control		Control	0	0	0	0	0	0	0.66	31.9	8.17	NRS	0	80	8.2	1.49	80	6.8	1.81
5	Kumar2020	23	India	Y	Yoga	Y	Exercise	2.3	30	5	8	69	345	0.72	30.5	8.01	HIT-6	0	80	66.5	15.69	80	53.7	11.01
5	Kumar2020	24	India	Y	Control		Control	0	0	0	0	0	0	0.66	31.9	8.17	HIT-6	0	80	65.6	5.39	80	60.8	8.87
6	Lemstra2002	17	Canada	Y	Aerobic	Y	Exercise	4	30	4	6	120	480	0.72	35.59	10.15	VAS	0	44	19.55	5.61	41	16.41	5
6	Lemstra2002	18	Canada	Y	Control		Control	0	0	0	0	0	0	0.58	33.17	13.21	VAS	0	36	2.78	1.98	36	0	1.98
6	Lemstra2002	19	Canada	Y	Aerobic	Y	Exercise	4	30	3	6	120	360	0.72	35.59	10.15	VAS	12	44	19.55	5.61	41	16.64	5.01
6	Lemstra2002	20	Canada	Y	Control		Control	0	0	0	0	0	0	0.58	33.17	13.21	VAS	12	36	2.78	1.98	36	0	1.98
7	Butt2022	25	Pakistan	N	Aerobic	Y	Exercise	4	50	2	12	200	400	0.85	33.2	11.69	NRS	0	14	8.5	0.75	14	6	0.6
7	Butt2022	26	Pakistan	N	Control		Control	0	0	0	0	0	0	0.85	26.21	6.89	NRS	0	14	8.64	0.74	14	7.64	0.74
7	Butt2022	27	Pakistan	N	Aerobic	Y	Exercise	4	50	2	12	200	400	0.85	33.2	11.69	NRS	6	14	8.5	0.75	14	4	0.7
7	Butt2022	28	Pakistan	N	Control		Control	0	0	0	0	0	0	0.85	26.21	6.89	NRS	6	14	8.64	0.74	14	6.78	0.69
7	Butt2022	29	Pakistan	N	Aerobic	Y	Exercise	4	50	2	12	200	400	0.85	33.2	11.69	HIT-6	0	14	70.35	3.95	14	40.57	3
7	Butt2022	30	Pakistan	N	Control		Control	0	0	0	0	0	0	0.85	26.21	6.89	HIT-6	0	14	71.57	6.36	14	65.64	6.14
7	Butt2022	31	Pakistan	N	Aerobic	Y	Exercise	4	50	2	12	200	400	0.85	33.2	11.69	HIT-6	6	14	70.35	3.95	14	45.85	3.08
7	Butt2022	32	Pakistan	N	Control		Control	0	0	0	0	0	0	0.85	26.21	6.89	HIT-6	6	14	71.57	6.36	14	60.85	5.05
8	Niu2024	33	Turkey	N	Aerobic+Resistance	Y	Exercise	4	35	3	24	140	420	0.51	68.35	5.29	MIDAS	0	50	19.05	2.75	50	9.44	1.07
8	Niu2024	34	Turkey	N	Control		Control	0	0	0	0	0	0	0.51	66.42	4.51	MIDAS	0	50	18.33	2.59	50	13.49	1.44
8	Niu2024	33	Turkey	N	Aerobic+Resistance	Y	Exercise	4	35	3	24	140	420	0.51	68.35	5.29	HIT-6	0	50	55.42	4.76	50	37.22	3.54
8	Niu2024	34	Turkey	N	Control		Control	0	0	0	0	0	0	0.51	66.42	4.51	HIT-6	0	50	53.77	4.22	50	46.19	3.76
9	Xie2022	35	China	Y	Tai Chi	Y	Exercise	3.3	20	2	12	66	132	1	50.9	10.2	VAS	0	42	4.5	2	39	3	1.7
9	Xie2022	36	China	Y	Control		Control	0	0	0	0	0	0	1	47.1	11.8	VAS	0	40	4.4	2.6	30	4.5	2.2
9	Xie2022	37	China	Y	Tai Chi	Y	Exercise	3.3	20	1.5	12	66	132	1	50.9	10.2	VAS	24	42	4.5	2	39	3.9	2.1
9	Xie2022	38	China	Y	Control		Control	0	0	0	0	0	0	1	47.1	11.8	VAS	24	40	4.4	1.8	23	4.4	1.7
10	Ozge2025	39	Turkey	N	Strench	Y	Exercise	2	20	2	8	40	80	1	30.7	3.8	VAS	0	20	7.7	1.1	20	5.5	0.9
10	Ozge2025	40	Turkey	N	Aerobic	Y	Exercise	3	30	2	8	90	180	1	31.1	4.5	VAS	0	20	7.6	1.3	20	5.3	1
10	Ozge2025	41	Turkey	N	Control		Control	0	0	0	0	0	0	1	30.4	4.21	VAS	0	20	7.8	1.2	20	5	1.1
11	Ozlem2024	42	Turkey	N	Yoga	Y	Exercise	2.3	45	3	12	103.5	310	1	35.8	7.78	VAS	0	20	8.07	2.4	15	7	2.1
11	Ozlem2024	43	Turkey	N	Control		Control	0	0	0	0	0	0	1	36.65	9.62	VAS	0	20	7.94	2	17	6.94	1.9
11	Ozlem2024	44	Turkey	N	Yoga	Y	Exercise	2.3	45	3	12	103.5	310	1	35.8	7.78	HIT-6	0	20	65.6	8.9	15	55.33	8.12
11	Ozlem2024	45	Turkey	N	Control		Control	0	0	0	0	0	0	1	36.65	9.62	HIT-6	0	20	66.94	7	17	63.65	6.76
11	Ozlem2024	46	Turkey	N	Yoga	Y	Exercise	2.3	45	3	12	103.5	310	1	35.8	7.78	MIDAS	0	20	107.13	48.3	15	27.27	19.04
11	Ozlem2024	47	Turkey	N	Control		Control	0	0	0	0	0	0	1	36.65	9.62	MIDAS	0	20	69.24	35.67	17	40.35	22.31
12	Alipouri2023	48	Iran	N	Aerobic	Y	Exercise	3	30	3	8	90	270	1	25.33	2.87	VAS	0	12	7.16	1.69	12	5.75	1.42
12	Alipouri2023	49	Iran	N	Control		Control	0	0	0	0	0	0	1	27.25	4.63	VAS	0	12	6.83	0.71	12	7.25	0.7
13	Rahimi2022	50	Iran	N	Aerobic	Y	Exercise	3	30	4	12	90	360	1	31.65	6.4	VAS	0	24	6.5	2.77	22	2.8	1.36
13	Rahimi2022	51	Iran	N	Control		Control	0	0	0	0	0	0	1	31.61	4.87	VAS	0	24	8.07	3.97	22	5.93	3.82
13	Rahimi2022	52	Iran	N	Aerobic	Y	Exercise	3	30	4	12	90	360	1	31.65	6.4	VAS	54	20	6.5	2.77	19	2.95	0.99
13	Rahimi2022	53	Iran	N	Control		Control	0	0	0	0	0	0	1	31.61	4.87	VAS	54	20	8.07	3.97	19	5.8	3.07
14	Johnson2025	54	USA	Y	Aerobic	Y	Exercise	3	30	3	4	90	270	0.98	28.6	4	Migraine intensity scale	0	11	44.18	6.66	10	38.27	4.66
14	Johnson2025	55	USA	Y	Control		Control	0	0	0	0	0	0	0.96	32.9	4	Migraine intensity scale	0	9	41.84	5.2	9	38.94	7.69
15	Krøll2017	56	Denmark	Y	Aerobic	Y	Exercise	4	45	3	4	180	540	0.88	42	10.9	NRS	0	36	5.6	3	26	4.5	2.4
15	Krøll2017	57	Denmark	Y	Control		Control	0	0	0	0	0	0	0.88	36	10.1	NRS	0	34	5.7	3	26	5.1	2.1
15	Krøll2017	58	Denmark	Y	Aerobic	Y	Exercise	4	45	3	4	180	540	0.88	42	10.9	NRS	12	36	5.6	3	26	4.7	2.1
15	Krøll2017	59	Denmark	Y	Control		Control	0	0	0	0	0	0	0.88	36	10.1	NRS	12	34	5.7	3	26	5.1	2.1
16	Boroujeni2014	60	Iran	Y	Yoga	Y	Exercise	2.3	75	3	12	172.5	517.5	1	35.4	7.9	VAS	0	21	7.67	3	15	5.27	2.09
16	Boroujeni2014	61	Iran	Y	Control		Control	0	0	0	0	0	0	1	34.9	8.37	VAS	0	21	6.64	3	15	6.73	2.41
17	Eslami2021	23	Iran	Y	Aerobic	Y	Exercise	4	40	3	8	160	360	1	38.41	6.2	VAS	0	15	7.38	2.3	13	3.73	1.62
17	Eslami2021	22	Iran	Y	HIIT	Y	Exercise	7	40	3	8	280	840	1	25.16	6.08	VAS	0	15	5.79	2.5	12	4.22	2.07
17	Eslami2021	24	Iran	Y	Control		Control	0	0	0	0	0	0	1	32.44	5.74	VAS	0	15	5.75	2.14	15	5.06	1.55
18	John2007	31	India	Y	Yoga	Y	Exercise	2.3	60	5	12	138	690	0.45	34.38	8.74	T-PRI	0	36	4.66	1	32	3.19	0.69
18	John2007	32	India	Y	Control		Control	0	0	0	0	0	0	0.18			T-PRI	0	36	4.97	1.2	32	5.54	0.5
18	John2007	33	India	Y	Yoga	Y	Exercise	2.3	60	5	12	138	690	0.45	34.38	8.74	VAS	0	36	2.94	0.91	32	1.69	0.47
18	John2007	34	India	Y	Control		Control	0	0	0	0	0	0	0.18			VAS	0	36	3.33	0.92	32	3.97	0.58
19	Aslani2022	43	Iran	Y	Resistance	Y	Exercise	3	50	3	8	150	450	1	30.25	6.1	VAS	0	12	67.7	37.59	10	28.8	25
19	Aslani2022	44	Iran	Y	Control		Control	0	0	0	0	0	0	1	30.1	7	VAS	0	8	53.75	26.73	8	50.87	15.44
20	Mehta2021	45	India	Y	Yoga	Y	Exercise	2.3	30	7	12	69	483	0.65	34.3	9.57	VAS	0	20	7.75	1.61	20	5.5	0.88
20	Mehta2021	46	India	Y	Strench	Y	Exercise	2	30	7	12	60	420	0.85	39.15	8.24	VAS	0	21	8.05	1.7	21	5.35	1.22
20	Mehta2021	47	India	Y	Control		Control	0	0	0	0	0	0	0.71	36.81	10.85	VAS	0	20	7.33	1.71	20	5.62	1.71
20	Mehta2021	48	India	Y	Yoga	Y	Exercise	2.3	30	7	8	69	483	0.65	34.3	9.57	VAS	0	20	7.75	1.61	20	6	1.07
20	Mehta2021	49	India	Y	Strench	Y	Exercise	2	30	7	12	60	420	0.85	39.15	8.24	VAS	0	21	8.05	1.7	21	6.1	1.29
20	Mehta2021	50	India	Y	Control		Control	0	0	0	0	0	0	0.71	36.81	10.85	VAS	0	20	7.33	1.71	20	5.86	1.74
20	Mehta2021	51	India	Y	Yoga	Y	Exercise	2.3	30	7	4	69	483	0.65	34.3	9.57	VAS	0	20	7.75	1.61	20	6.8	1.36
20	Mehta2021	52	India	Y	Strench	Y	Exercise	2	30	7	12	60	420	0.85	39.15	8.24	VAS	0	21	8.05	1.7	21	7.2	1.63
20	Mehta2021	53	India	Y	Control		Control	0	0	0	0	60	420	0.71	36.81	10.85	VAS	0	20	7.33	1.71	20	6.52	1.6
20	Mehta2021	54	India	Y	Yoga	Y	Exercise	2.3	30	7	12	69	483	0.65	34.3	9.57	HIT-6	0	20	63.7	7.77	20	58.1	7.16
20	Mehta2021	55	India	Y	Strench	Y	Exercise	2	30	7	12	60	420	0.85	39.15	8.24	HIT-6	0	21	65.1	7.9	21	59.75	7.52
20	Mehta2021	56	India	Y	Control		Control	0	0	0	0	60	420	0.71	36.81	10.85	HIT-6	0	20	59.86	8	20	54.38	7.72
20	Mehta2021	57	India	Y	Yoga	Y	Exercise	2.3	30	7	8	69	483	0.65	34.3	9.57	HIT-6	0	20	63.7	8	20	60.75	6.58
20	Mehta2021	58	India	Y	Strench	Y	Exercise	2	30	7	12	60	420	0.85	39.15	8.24	HIT-6	0	21	65.1	8.2	21	61.95	7.76
20	Mehta2021	59	India	Y	Control		Control	0	0	0	0	60	420	0.71	36.81	10.85	HIT-6	0	20	59.86	8.11	20	55.9	7.27
20	Mehta2021	60	India	Y	Yoga	Y	Exercise	2.3	30	7	4	69	483	0.65	34.3	9.57	HIT-6	0	20	63.7	7.12	20	61.85	6.49
20	Mehta2021	61	India	Y	Strench	Y	Exercise	2	30	7	12	60	420	0.85	39.15	8.24	HIT-6	0	21	65.1	8	21	63.9	7.69
20	Mehta2021	62	India	Y	Control		Control	0	0	0	0	60	420	0.71	36.81	10.85	HIT-6	0	20	59.86	7.06	20	58.14	6.96
21	Darabanea2011	63	USA	Y	Aerobic	Y	Exercise	4	30	3	10	120	360	NA	NA	NA	NRS	0	8	0.7	0.4	8	0.4	0.3
21	Darabanea2011	64	USA	Y	Control		Control	0	0	0	0	0	0	NA	NA	NA	NRS	0	8	0.5	0.3	8	0.5	0.2
22	Bond2018	69	USA	Y	Aerobic	Y	Exercise	4	40	3	16	160	480	1	38.5	7.4	NRS	0	54	0.8	0.3	54	0.7	0.1
22	Bond2018	70	USA	Y	Control		Control	0	0	0	0	0	0	1	40	8.4	NRS	0	56	1	0.3	56	0.7	0.2
22	Bond2018	71	USA	Y	Aerobic	Y	Exercise	4	40	3	16	160	480	1	38.5	7.4	HIT-6	0	54	5.4	4.6	54	5	4
22	Bond2018	72	USA	Y	Control		Control	0	0	0	0	0	0	1	40	8.4	HIT-6	0	56	4.4	4.2	56	4	4
23	Peres2018	73	Brazil	Y	Control		Control	0	0	0	0	0	0	0.84	41.1	16.4	NRS	0	25	3	2	24	1.6	1.18
23	Peres2018	74	Brazil	Y	Aerobic	Y	Exercise	4	30	3	24	120	360	0.8	41.8	19.7	NRS	0	25	2.5	2	18	1.6	0.89
24	Sun2021	84	China	Y	Resistance	Y	Exercise	3	60	2	12	180	360	0.81	33.1	5.9	VAS	0	145	2.7	0.8	145	1.2	0.5
24	Sun2021	85	China	Y	Control		Control	0	0	0	0	0	0	0.83	34.5	6.3	VAS	0	141	2.9	1	141	2	0.6
24	Sun2021	86	China	Y	Resistance	Y	Exercise	3	60	2	12	180	360	0.81	33.1	5.9	VAS	16	145	2.7	0.7	145	1	0.5
24	Sun2021	87	China	Y	Control		Control	0	0	0	0	0	0	0.83	34.5	6.3	VAS	16	141	2.9	0.8	141	2.6	0.6
25	Kaushal2023	88	India	N	Yoga	Y	Exercise	2.3	30	5	3	69	345	0.87	37.1	10.2	VAS	0	40	8.13	3	40	5.53	2
25	Kaushal2023	89	India	N	Control		Control	0	0	0	0	0	0	0.95	35.98	8.69	VAS	0	40	9.03	3.4	40	7.15	3
25	Kaushal2023	90	India	N	Yoga	Y	Exercise	2.3	30	5	3	69	345	0.87	37.1	10.2	HIT-6	0	40	68.58	8.5	40	57.95	7.9
25	Kaushal2023	91	India	N	Control		Control	0	0	0	0	0	0	0.95	35.98	8.69	HIT-6	0	40	72.03	22	40	61.58	21.06
26	Matin2022	92	Iran	N	HIIT	Y	Exercise	5	40	3	8	280	840	1	30	4	MIDAS	0	16	44.9	3.3	15	30.5	2.39
26	Matin2022	93	Iran	N	Control		Control	0	0	0	0	0	0	1	30.5	4	MIDAS	0	16	45.8	5.3	15	36.2	4.5
27	Kumari2022	94	India	N	Yoga	Y	Exercise	2.3	30	5	3	69	345	1	33.17	5	VAS	0	23	9.06	1.2	17	5	1
27	Kumari2022	95	India	N	Control		Control	0	0	0	0	0	0	1	33.2	5	VAS	0	20	8.88	1.2	17	5.88	1.17
27	Kumari2022	94	India	N	Yoga	Y	Exercise	2.3	30	5	3	69	345	1	33.17	5	HIT-6	0	23	72.53	8	17	58.29	7.45
27	Kumari2022	95	India	N	Control		Control	0	0	0	0	0	0	1	33.2	5	HIT-6	0	20	68.59	7	17	58	6.85
